# Supplementary material for: Nuclear Lamin B1 Interactions With Chromatin During the Circadian Cycle Are Uncoupled From Periodic Gene Expression
Source: PubMed Central journal article supplement (PMC6785633; doi:10.3389/fgene.2019.00917), 2019-10-03
Supplement: Presentation_1.pdf [file Presentation_1.pdf]

## Supplementary information

**Supplementary Table S1.** RT-qPCR and ChIP-qPCR primers used in this study.

**Supplementary Table S2.** LAD detection parameters using EDD.

**Supplementary Table S3.** MetaCycle analysis of expression of central clock regulators and *Lmnb1* determined by RT-qPCR and RNA-seq.

**Supplementary Table S4.** Lists of periodic and non-periodic genes. (Excel; classifiable lists-Supplementary Table 4)

**Supplementary Table S5.** Periodic genes classified by phase within periods. (Excel - Supplementary Table 5)

**Supplementary Table S6.** Gene ontology terms enriched for periodic genes.

**Supplementary Table S7.** Analysis of LAD intersects.

**Supplementary Table S8.** Characterization of periodic LADs by MetaCycle. (Excel; classifiable lists - Supplementary Table 8)

**Supplementary Table S9.** Distances between central clock-regulating genes and nearest LADs.

---

**Supplementary Table S1.** RT-qPCR and ChIP-qPCR primers used in this study.

| <b>Amplicon</b>                           | <b>Chr.</b> | <b>Forward primer (F)<br/>Reverse primer (R)</b>           | <b>mm10<br/>Genomic position (nt)</b> |
|-------------------------------------------|-------------|------------------------------------------------------------|---------------------------------------|
| <b>RT-qPCR primers</b>                    |             |                                                            |                                       |
| <i>Clock</i>                              | 11          | F: CCTAGAAAATCTGGCAAATGTCA<br>R: CCTTTTCCATATTGCATTAAGTGCT |                                       |
| <i>Per1</i>                               | 1           | F: ACCAGCGTGTGCATGATGACATA<br>R: GTGCACAGCACCCAGTTCCC      |                                       |
| <i>Arntl</i>                              | 5           | F: GCAGTGCCACTGACTACCAAGA<br>R: TCCTGGACATTGCATTGCAT       |                                       |
| <i>Nr1d1</i>                              | 2           | F: CTGGAGGGCTGCAGTATAGC<br>R: CGGTCATTCAAACCTGGACCT        |                                       |
| <i>Cry1</i>                               | 16          | F: CAGACTCACTCACTCAAGCAAGG<br>R: TCAGTTACTGCTCTGCCGCTGGAC  |                                       |
| <i>Eif2a</i>                              | 3           | F: CAACGTGGCAGCCTTACA<br>R: TTTCATGTCATAAAGTTGTAGGTTAGG    |                                       |
| <b>ChIP-qPCR primers</b>                  |             |                                                            |                                       |
| cLAD-1 chr.11                             | 11          | F: TAACCACCGTGTCTCTAAGCG<br>R: TCCGGTGTGACTTAGCATGA        | chr11:81201226-81201309               |
| cLAD-1 chr.1                              | 1           | F: GCCACCAACATGGAGTCAGA<br>R: CAGGCTCTGAATGGAGCCAA         | chr1:190487280-190487361              |
| cLAD-1 chr.5                              | 5           | F: TGCTGTGAGCATTGGTCTCT<br>R: GCCTCCACCTCAGTCACTTC         | chr5:126224330-126224438              |
| cLAD-1 chr.2                              | 2           | F: CCTGACTTTTACCGTCCCAATC<br>R: TGCTACTACACAAGGCCCCAA      | chr2:156231214-156231331              |
| cLAD-1 chr.16                             | 16          | F: GTTTTTCATCGGACGGTGGC<br>R: CCGCCGCTCATAACCCATAA         | chr16:10796381-10796520               |
| cLAD-2 chr.1                              | 1           | F: CCACAGCATCCCAGTTTCTCT<br>R: CAGGGACCTTCCAGGTTTCC        | chr1:113441259-113441360              |
| cLAD-2 chr.5                              | 5           | F: TCTCTGCCACAGACTGCAAG<br>R: GCCTTCTGGTCTCCTGCTTT         | chr5:55584684-55584784                |
| cLAD-1 chr.12                             | 12          | F: AGCTCCTTGTCTTGCTGCTC<br>R: AGAATAGCGAGTGCCCAACC         | chr12:47158301-47158371               |
| cLAD-2 chr.16                             | 16          | F: TGGAGTTCTGCAAGGCTGAG<br>R: ACTGCTTGCTGCTCTCCTTT         | chr16:82996670-82996796               |
| vLAD chr.1                                | 1           | F: GGTGGCATCAGCTCCAAAGT<br>R: AGCTTTTATTTTCTCAAAGGCAGGT    | chr1:123423631-123423729              |
| vLAD chr.5                                | 5           | F: CAGTTGCTGGGACTGTAGCA<br>R: AAAGTGTGAGCCCAGGATGG         | chr5:48143370-48143444                |
| vLAD chr.12                               | 12          | F: GAGGAGCAAACCTGTTCCCA<br>R: AGCTTTTACTCTGTGCCCCC         | chr12:38104881-38105004               |
| vLAD chr.16                               | 16          | F: TCCCCAGCAACATTCCAGAC<br>R: AGCAACAAATGTGCAGGCAG         | chr16:39947233-39947346               |
| nonLAD chr.6<br>( <i>Gadh</i> promoter)   | 6           | F: GTTGCCTGCGCTAGCAAAG<br>R: GACCGGGATTCTTCACTCCG          | chr6:125166811-125166927              |
| nonLAD chr.7                              | 7           | F: CACCGGCTTACCGAATACT<br>R: GGAGAGAAACGGGGTTCCG           | chr7:25315585-25315719                |
| nonLAD chr.11<br>( <i>Ube2b</i> promoter) | 11          | F: GCCGAACCTTGAACTAGCGAC<br>R: GTTGCTTGCAGGCAACTACG        | chr11:52000592-52000714               |
| nonLAD chr.18<br>( <i>Lmn1</i> promoter)  | 18          | F: GGTCAAGTCATTGGTGGGCT<br>R: TCATTGGCTATGAACGCGGA         | chr18:56707121-56707212               |

cLAD, constitutive LAD; vLAD, variable LAD.

**Supplementary Table S2.** LAD detection parameters using EDD.

|                      |                    | NS    |      | T0    |      | T6    |       | T12  |      | T18   |      | T24   |       | T30   |       |
|----------------------|--------------------|-------|------|-------|------|-------|-------|------|------|-------|------|-------|-------|-------|-------|
|                      |                    | Rep1  | Rep2 | Rep1  | Rep2 | Rep1  | Rep2  | Rep1 | Rep2 | Rep1  | Rep2 | Rep1  | Rep2  | Rep1  | Rep2  |
| EDD parameters       | Mean(BinSize) (bp) | 61000 | 4000 | 47000 | 4000 | 35000 | 11000 | 1000 | 5000 | 19000 | 6000 | 14000 | 18000 | 31000 | 46000 |
|                      | Mean(GapPenalty)   | 3.70  | 6.20 | 3.50  | 5.00 | 4.40  | 4.30  | 4.10 | 6.40 | 3.60  | 3.60 | 3.50  | 4.20  | 4.00  | 5.00  |
|                      | StdDev(GapPenalty) | 1.20  | 0.50 | 0.40  | 0.20 | 0.80  | 0.50  | 0.40 | 0.10 | 0.40  | 0.10 | 0.30  | 0.30  | 0.80  | 1.60  |
|                      | Edd Error (Mb)     | 0.98  | 1.24 | 0.11  | 0.16 | 0.95  | 0.30  | 0.11 | 0.12 | 0.46  | 0.19 | 0.34  | 0.51  | 0.78  | 0.69  |
| # RemovedLADs        |                    | 0     | 79   | 0     | 39   | 0     | 4     | 4    | 39   | 0     | 13   | 0     | 0     | 0     | 0     |
| # LADs in replicates |                    | 74    | 372  | 97    | 320  | 130   | 280   | 242  | 300  | 154   | 346  | 179   | 183   | 138   | 127   |
| # LADs in intersect  |                    | 93    |      | 111   |      | 153   |       | 225  |      | 198   |      | 163   |       | 111   |       |

**Supplementary Table S3.** MetaCycle analysis of expression of central clock regulators and *Lmnb1* determined by RT-qPCR and RNA-seq.

|         | Gene         | P-value ID      | P-value | Period ID | Period | Phase | Base | Amplitude |
|---------|--------------|-----------------|---------|-----------|--------|-------|------|-----------|
| RT-qPCR | <i>Lmnb1</i> | Non-Significant | 9.8E-01 | 12h       | 13.7   | 13.2  | 0.3  | 0.0       |
|         | <i>Clock</i> | Periodic        | 4.7E-04 | 24h       | 23.7   | 23.6  | 0.9  | 0.6       |
|         | <i>Arntl</i> | Periodic        | 3.1E-10 | 24h       | 23.1   | 22.3  | 0.5  | 0.5       |
|         | <i>Cry1</i>  | Periodic        | 1.7E-06 | 24h       | 22.7   | 19.7  | 3.9  | 3.5       |
|         | <i>Per1</i>  | Non-Significant | 7.2E-02 | 18h       | 15.0   | 13.7  | 0.3  | 0.4       |
|         | <i>Nr1d1</i> | Periodic        | 5.1E-11 | 24h       | 23.8   | 7.9   | 0.9  | 1.1       |
| RNA-seq | <i>Lmnb1</i> | Non-Significant | 1.6E-01 | 12h       | 12.0   | 6.7   | 6.5  | 0.6       |
|         | <i>Clock</i> | Periodic        | 4.6E-06 | 24h       | 22.8   | 1.0   | 17.3 | 4.7       |
|         | <i>Arntl</i> | Periodic        | 2.1E-06 | 24h       | 23.0   | 0.0   | 17.0 | 14.2      |
|         | <i>Cry1</i>  | Periodic        | 1.2E-08 | 24h       | 23.0   | 19.9  | 23.1 | 14.3      |
|         | <i>Cry2</i>  | Non-Significant | 1.4E-02 | 18h       | 18.0   | 9.6   | 26.4 | 1.6       |
|         | <i>Per1</i>  | Non-Significant | 2.1E-01 | 18h       | 18.7   | 13.6  | 14.1 | 11.9      |
|         | <i>Per2</i>  | Periodic        | 2.7E-07 | 30h       | 29.3   | 14.3  | 17.7 | 11.3      |
|         | <i>Per3</i>  | Periodic        | 3.0E-06 | 24h       | 23.9   | 14.1  | 13.1 | 10.1      |
|         | <i>Nr1d1</i> | Periodic        | 7.1E-06 | 24h       | 24.4   | 8.2   | 41.7 | 39.7      |
|         | <i>Nr1d2</i> | Periodic        | 1.7E-03 | 24h       | 24.2   | 11.3  | 24.2 | 10.6      |
|         | <i>Rorc</i>  | Periodic        | 3.2E-05 | 30h       | 28.0   | 19.7  | 50.6 | 19.9      |
|         | <i>Ube2b</i> | Non-Significant | 1.3E-01 | 24h       | 21.1   | 15.8  | 43.6 | 0.4       |

For MetaCycle analysis, see Main text; these values are used for best-fits. Function used for best-fit:  
 $F[x] = \text{Amplitude} * \text{Cos}[(2\pi/\text{Period})(x - \text{Phase})] + \text{Base}$ .

**Supplementary Table S6.** Gene ontology terms enriched for periodic genes.

| PANTHER GO-Slim Biological Process           | No. genes in ref. genome | No. genes in GO term | Expected No. genes | Fold Enrichment | P-value  | FDR      | Over/under representation |
|----------------------------------------------|--------------------------|----------------------|--------------------|-----------------|----------|----------|---------------------------|
| <b>12h period</b>                            |                          |                      |                    |                 |          |          |                           |
| DNA repair                                   | 153                      | 8                    | 1.4                | 5.73            | 1.12E-04 | 9.08E-03 | +                         |
| regulation of biological process             | 3320                     | 12                   | 30.27              | 0.4             | 9.70E-05 | 1.18E-02 | -                         |
| nitrogen compound metabolic process          | 2462                     | 42                   | 22.45              | 1.87            | 7.02E-05 | 1.71E-02 | +                         |
| nucleobase-containing metabolic process      | 2710                     | 42                   | 24.71              | 1.7             | 5.41E-04 | 2.20E-02 | +                         |
| cellular component biogenesis                | 733                      | 17                   | 6.68               | 2.54            | 4.89E-04 | 2.39E-02 | +                         |
| RNA metabolic process                        | 1536                     | 28                   | 14.01              | 2               | 4.64E-04 | 2.83E-02 | +                         |
| <b>18h period</b>                            |                          |                      |                    |                 |          |          |                           |
| None                                         |                          |                      |                    |                 |          |          |                           |
| <b>24h period</b>                            |                          |                      |                    |                 |          |          |                           |
| rhythmic process                             | 13                       | 4                    | 0.15               | 27.4            | 3.15E-05 | 2.57E-03 | +                         |
| circadian rhythm                             | 13                       | 4                    | 0.15               | 27.4            | 3.15E-05 | 3.85E-03 | +                         |
| metabolic process                            | 6009                     | 98                   | 67.48              | 1.45            | 3.05E-05 | 7.44E-03 | +                         |
| sensory perception of smell                  | 699                      | 0                    | 7.85               | < 0.01          | 6.84E-04 | 2.78E-02 | -                         |
| sensory perception of chemical stimulus      | 748                      | 0                    | 8.4                | < 0.01          | 4.84E-04 | 2.95E-02 | -                         |
| G-protein coupled receptor signaling pathway | 875                      | 1                    | 9.83               | 0.1             | 8.52E-04 | 2.97E-02 | -                         |
| protein localization                         | 494                      | 15                   | 5.55               | 2.7             | 6.09E-04 | 2.97E-02 | +                         |
| <b>30h period</b>                            |                          |                      |                    |                 |          |          |                           |
| DNA binding transcription factor activity    | 34                       | 5                    | 0.27               | 18.29           | 1.41E-05 | 3.44E-03 | +                         |
| regulation of molecular function             | 436                      | 12                   | 3.51               | 3.42            | 2.67E-04 | 3.25E-02 | +                         |
| <b>Non-periodic</b>                          |                          |                      |                    |                 |          |          |                           |
| None                                         |                          |                      |                    |                 |          |          |                           |

+, over-representation; -, under-representation.

**Supplementary Table S7.** Analysis of LAD intersects.

|                                 | NS            |               | T0            |               | T6            |               | T12           |               | T18           |               | T24           |               | T30           |               |
|---------------------------------|---------------|---------------|---------------|---------------|---------------|---------------|---------------|---------------|---------------|---------------|---------------|---------------|---------------|---------------|
|                                 | Rep1          | Rep2          | Rep1          | Rep2          | Rep1          | Rep2          | Rep1          | Rep2          | Rep1          | Rep2          | Rep1          | Rep2          | Rep1          | Rep2          |
| LAD size variation (Mb)         | vs. Intersect | vs. Intersect | vs. Intersect | vs. Intersect | vs. Intersect | vs. Intersect | vs. Intersect | vs. Intersect | vs. Intersect | vs. Intersect | vs. Intersect | vs. Intersect | vs. Intersect | vs. Intersect |
|                                 | 001           | 001           | 001           | 001           | 000           | 001           | 000           | 000           | 000           | 001           | 001           | 001           | 001           | 001           |
| LAD coverage per replicate (Mb) | 335.29        | 526.51        | 423.75        | 574.97        | 495.17        | 584.04        | 586.34        | 553.19        | 617.87        | 662.99        | 631.35        | 540.44        | 405.39        | 392.37        |
| LAD coverage (intersect) (Mb)   | 258.87        |               | 339.59        |               | 434.22        |               | 496.13        |               | 515.81        |               | 474.77        |               | 311.99        |               |

**Supplementary Table S9.** Distance between central clock-regulating genes and nearest LADs.

| Gene                 | Chr. | Dist. 5' end of gene to LAD (Mb) | Dist. 3' end of gene to LAD (Mb) |
|----------------------|------|----------------------------------|----------------------------------|
| <i>Clock</i>         | 5    | -4.2                             | +1.6                             |
| <i>Arntl (Bmal1)</i> | 7    | -5.2                             | no LAD                           |
| <i>Cry1</i>          | 10   | -10.8                            | +12.6                            |
| <i>Per1</i>          | 11   | -20.8                            | +21.6                            |
| <i>Per2</i>          | 1    | -41.4                            | +2.7                             |
| <i>Per3</i>          | 4    | -3.2                             | no LAD                           |
| <i>Nr1d1</i>         | 11   | -5.3                             | no LAD                           |
| <i>Nr1d2</i>         | 14   | -10.5                            | +19.3                            |
| <i>Rorc</i>          | 3    | -1.5                             | +15.7                            |

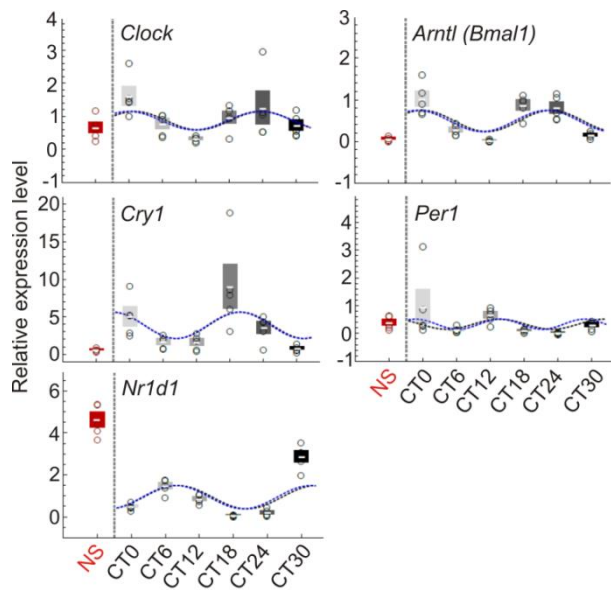

**Supplementary Figure S1.** Circadian expression of central clock genes. RT-qPCR analysis of expression of clock genes in non-synchronized (NS) mice and from CT0 to CT30 (mean  $\pm$  SD, single data points;  $n = 5$  mice at NS and per CT). Blue line, MetaCycle best-fit from RT-qPCR data; black line, MetaCycle best-fit from RNA-seq data; note the strong overlap between the two. Amplitude and base values used for both fits are from RT-qPCR MetaCycle analysis.

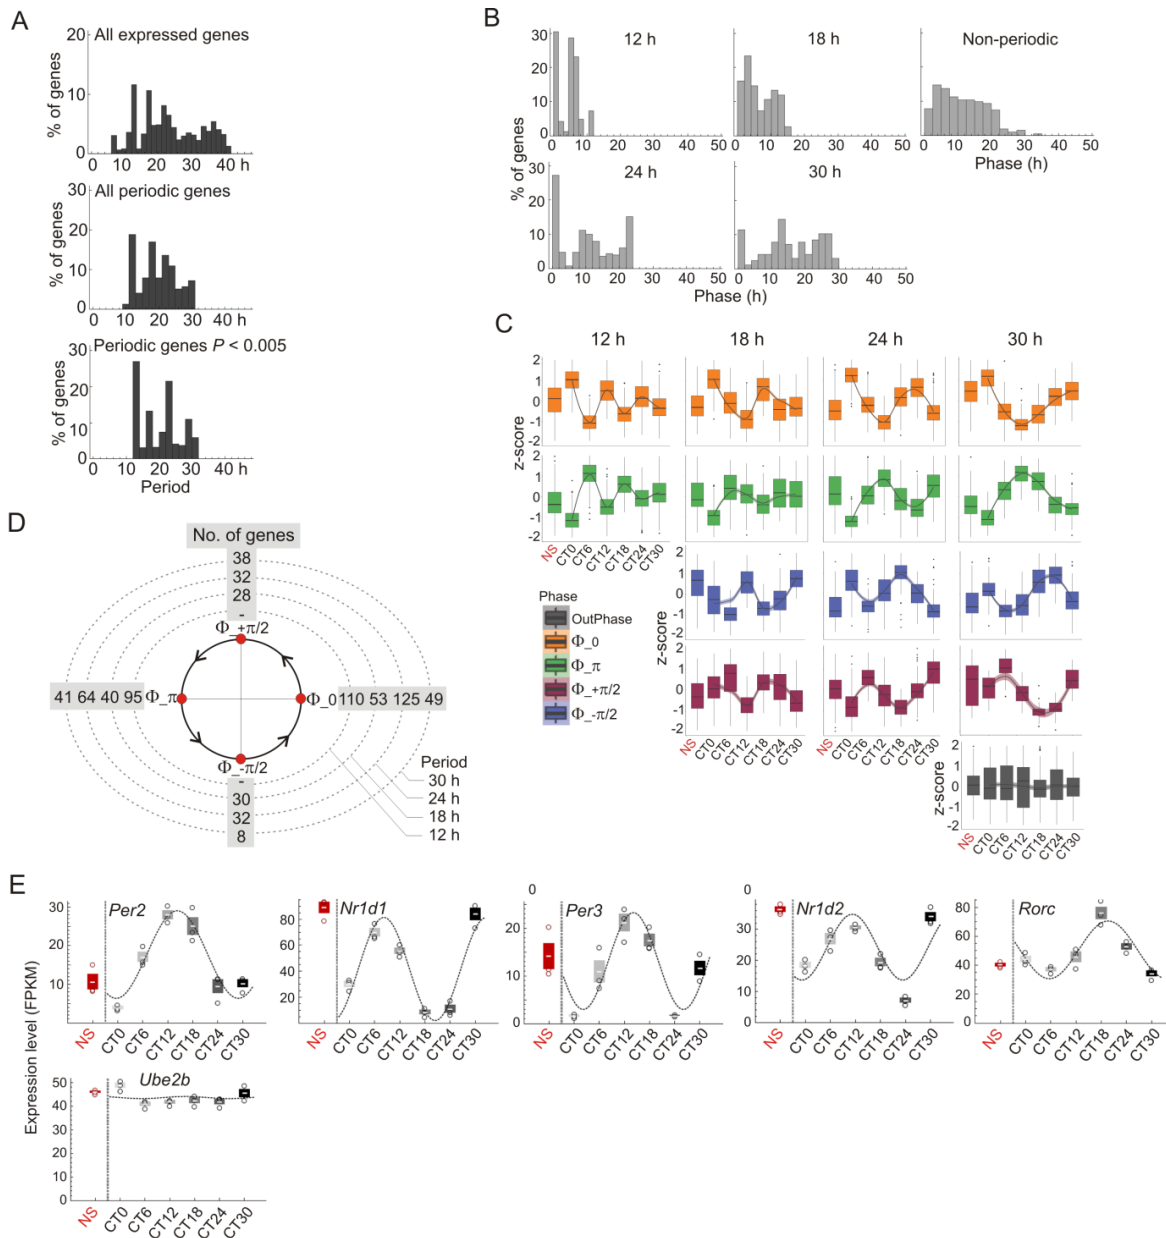

**Supplementary Figure S2.** Characterization of periodic gene expression in liver. **(A)** Period distribution of all 17,330 expressed genes, all periodic genes and significantly ( $P < 0.005$ ; Fisher's exact test) periodic genes. **(B)** Phase distribution of periodic genes (x axis), shown as % of genes in indicated periods. **(C)** Expression of periodic genes according to their phase (median, upper/lower quartiles, maxima/minima and smoothing of medians  $\pm$  SD). **(D)** Trigonometric clock and number of significantly ( $P < 0.005$ ) periodic genes with indicated period (circle dotted lines) and phase (central circular axis). **(E)** RNA-seq analysis of circadian expression of central clock genes and the housekeeping gene *Ube2b* ( $n = 3$  mice per CT; mean  $\pm$  SD, individual data points). Cosine curves in are best-fits from MetaCycle; fitting function  $F[x] = \text{Amplitude} * \text{Cos}[(2\pi/\text{Period})(x - \text{Phase})] + \text{Base}$ ; see **Supplementary Table S3**.

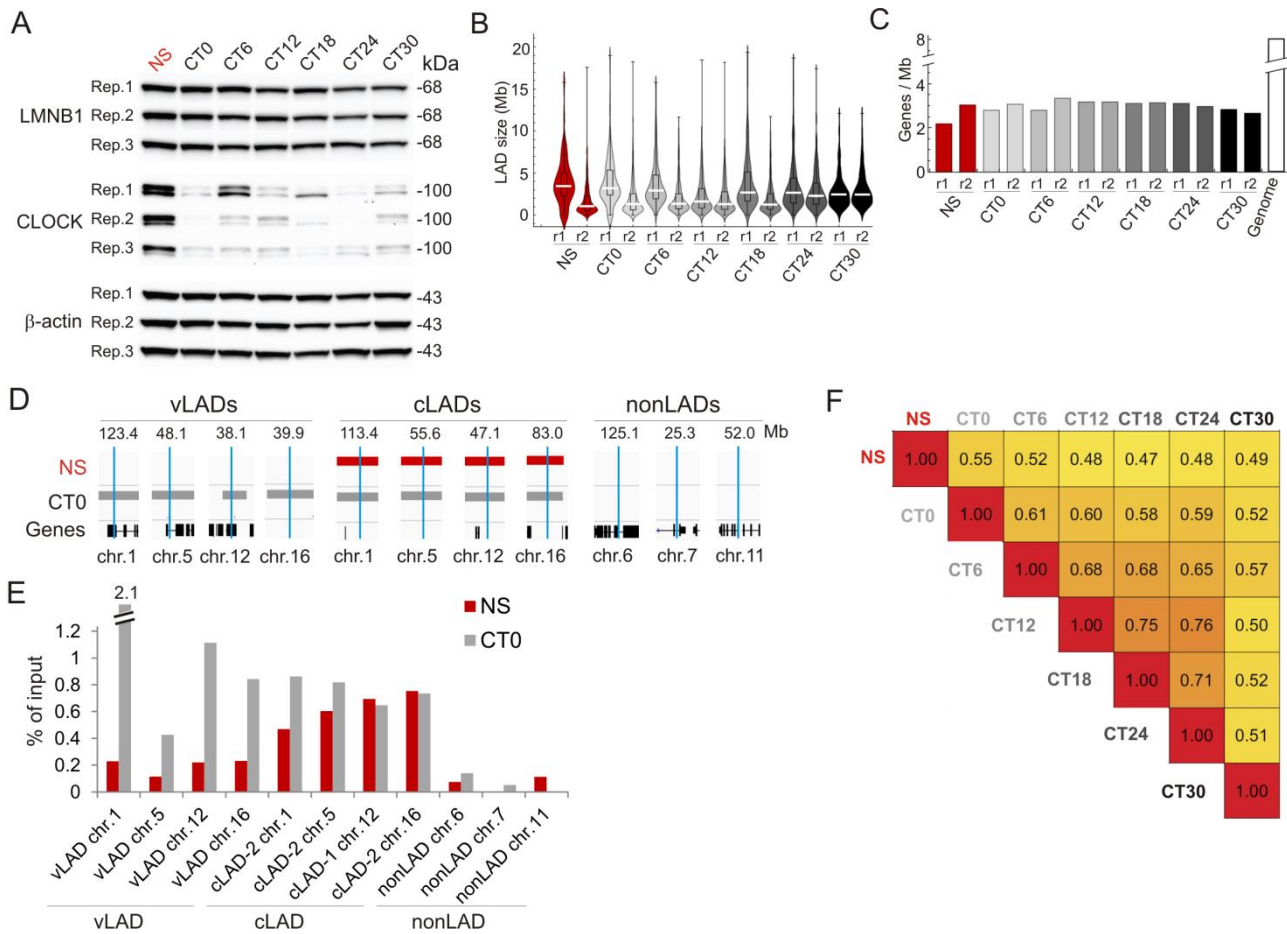

**Supplementary Figure S3.** Characterization of LMNB1 LADs during the circadian cycle. **(A)** Western blots of LMNB1 and CLOCK expression;  $\beta$ -actin was used as loading control (biological triplicate). Each replicate blot (Rep.1/2/3) is from the liver of one mouse per CT. **(B)** Median (white bars) and violin plot distribution of LAD sizes for each CT and biological replicate (r1, r2). **(C)** Gene density in LADs and in the mm10 genome. **(D)** Genome browser views of variable LAD (vLAD), constitutive LAD (cLAD) and nonLAD regions at NS and CT0, with position of amplicons (blue bars, in Mb on indicated chromosomes; bottom) analyzed by ChIP-qPCR in **(E)**. **(E)** ChIP-qPCR analysis of LMNB1 enrichment in indicated vLAD, cLAD and nonLAD regions; see **Supplementary Table S1** for position of amplicons. **(F)** Jaccard indices of LAD coverage overlap between CTs (values are for for LAD intersects of both replicates at each CT).

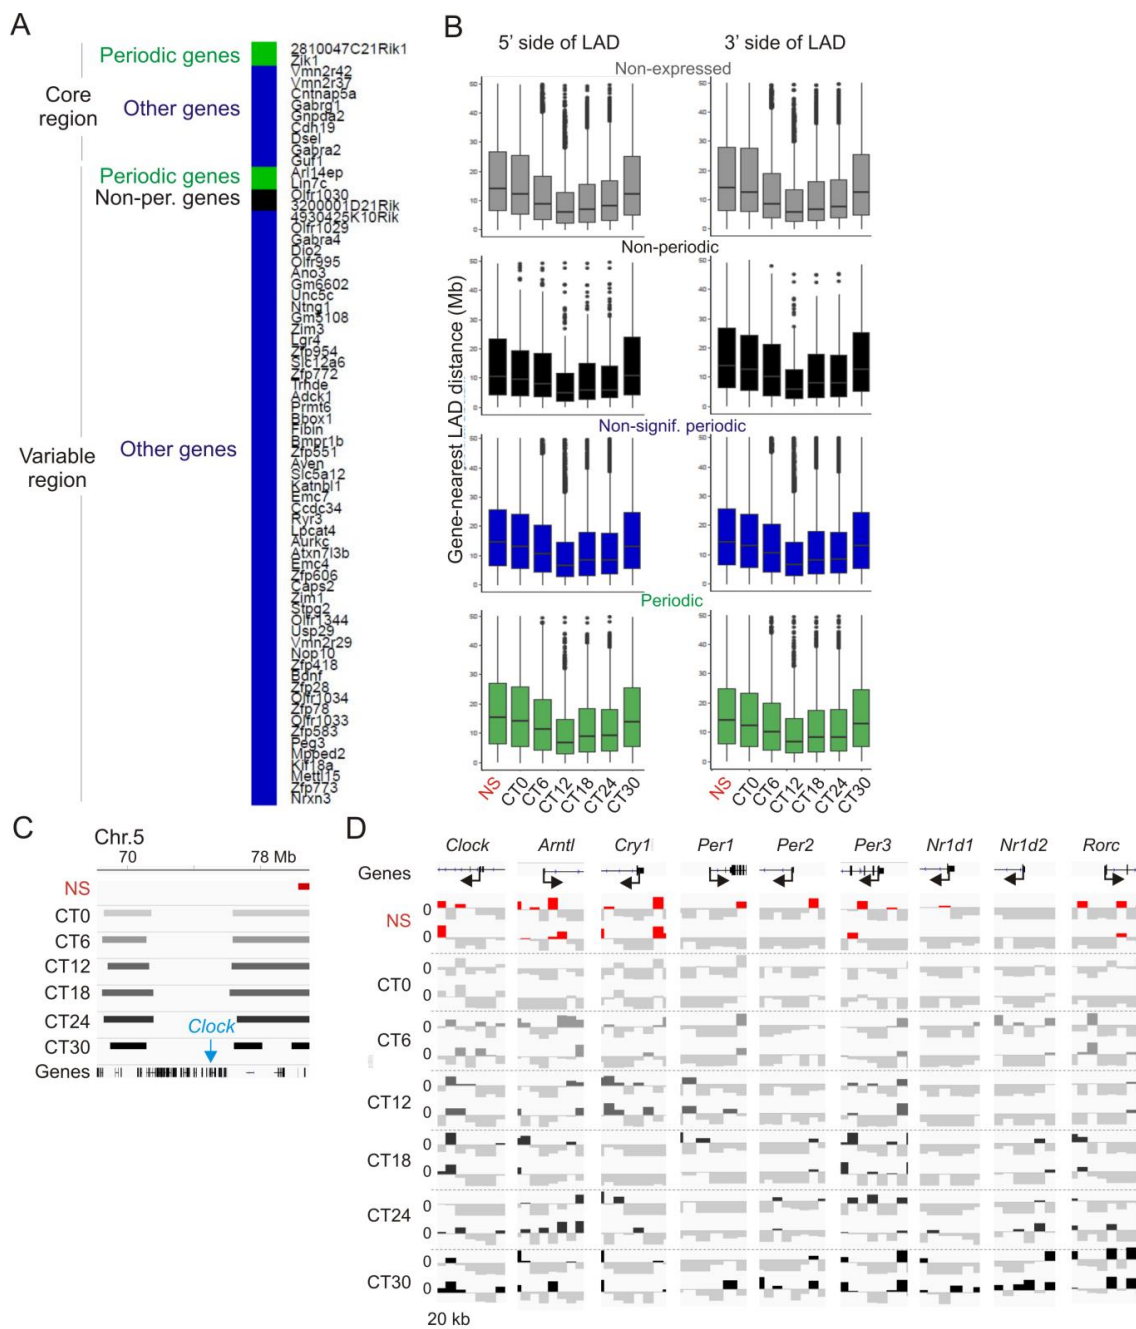

**Supplementary Figure S4.** Gene-to-nearest LAD distances are uncoupled from periodic gene expression. **(A)** List of genes in periodic LADs, classified in the core and variable regions in **Figure 5B**. **(B)** Box plots of variation in gene-to-nearest LAD distance at the 5' and 3' sides of LADs (median, upper/lower quartiles, maxima/minima); data are shown for non-expressed genes (n = 4820), non-periodic genes (n = 204), non-significantly periodic genes (n = 15685) and periodic genes (n = 1441). **(C)** Genome browser view of LADs in a fragment of chromosome 5 showing *Clock* between two LADs. **(D)** The transcription start site (arrow) of central clock-control genes is devoid of LMNB1 interaction detectable by ChIP. The panel shows genome browser views of LMNB1 enrichment in promoter regions for each ChIP replicate and CT. Data are shown for 10 kb bins, as  $\log_2(\text{ChIP}/\text{input})$  ratios (y axis, scale: -0.3 to +0.3).
