# Supplementary material for: Nuclear Lamin B1 Interactions With Chromatin During the Circadian Cycle Are Uncoupled From Periodic Gene Expression
Source: Front Genet. 2019 Oct 3;10:917. doi: 10.3389/fgene.2019.00917 (PMC6785633; doi:10.3389/fgene.2019.00917)
Supplement: Supplementary file 3 [file Table_5.xlsx]

## Sheet: -
Supplementary Table S5. Periodic genes classified by phase within periods.
12 h period			18 h period					24 h period					30 h period
Phi_0	Phi_PI		Phi_0	Phi_PI	- PI/2	+ PI/2		Phi_0	Phi_PI	- PI/2	+ PI/2		Phi_0	Phi_PI	- PI/2	+ PI/2
4833420G17Rik	0610010K14Rik		1110020A21Rik	A930015D03Rik	1110051M20Rik	Abca2		2810459M11Rik	4931428F04Rik	Abhd8	A730036I17Rik		Abi3	Agpat1	9930014A18Rik	1700003G18Rik
9430015G10Rik	1700092C10Rik		1700030C10Rik	Acvr1	1700001L05Rik	Als2cl		Aaed1	Abcb8	Acot7	Abracl		Ada	Agpat5	Asap2	2010003K11Rik
Ablim3	2610524H06Rik		3110043O21Rik	Ajuba	Atg13	Arhgef19		Acot2	Adarb1	Adnp2	Anapc4		Adck5	Aimp2	B3galnt2	4930581F22Rik
Agap3	2810002D19Rik		4930432K21Rik	Amot	Atg2b	Cldn1		Arl4a	Alkbh6	Agmo	BC052040		Abi3	Amd1	Ccdc130	Dcun1d4
Alkbh5	4732491K20Rik		4930523C07Rik	Ampd2	Atm	Crb3		Arntl	Atic	Ahctf1	Brd9		Ada	Anxa11	Clic4	Dopey1
Angptl4	4930470H14Rik		4930562F07Rik	Ankrd17	Brox	Ctbs		Atat1	B3galnt1	Caln1	Camkmt		Adck5	Brca1	Cnnm3	Mmp9
Ankrd12	A430088P11Rik		4931408D14Rik	Arid1a	Cbfb	D930048N14Rik		Atf5	B4galnt4	Cpsf4l	Ccnjl		Aig1	C730036E19Rik	Dnmt3b	Pbrm1
Anks3	Ablim1		Abtb2	Atf6b	Clmn	Dnmbp		Avpr1a	BC024139	Cry1	Cobl		Cd79b	Ccdc57	Fam220a	Ppargc1b
Atg16l1	Adam7		Ap2a2	Bricd5	Fam53b	Dpp9		Axin1	Bhlhe41	Crybg3	D430042O09Rik		Defb1	Cys1	Fam84b
Bag5	Alpk3		Atf6	Ccdc85c	Fam76a	Fgd6		B3gat3	Car5b	Ddhd2	Dnajc10		Dennd5a	Fam47e	Grk5
Baz1a	Asph		Bach1	Ccne1	Fanca	Gclc		B430212C06Rik	Chd1l	Dntt	Exoc4		Dyrk2	Galnt11	Ints12
Bcas3	Atp2b2		Btg2	Cul9	Fbxo34	Gmeb1		Blcap	Cpeb1	Dvl2	Fam229b		Elovl5	Gm10390	Itgb1bp1
Bet1l	B3galt1		Clk3	E2f2	Hook2	Helz2		Bmp1	Cpm	Fam120b	Itga8		Eomes	Homer2	Leo1
Bfar	Bbs12		Clstn3	Etv5	Lgi2	Hs3st6		Btd	Csf1	Gga2	Klhdc7a		Fam69a	Hs6st1	Lingo4
Brd1	C1ql3		Dhx16	F3	Mphosph9	Ip6k2		Caprin1	Cyp2g1	Gm19522	Loxl4		Galnt18	Ifrd2	Mapk15
Brf1	Cc2d1b		Fam131c	Fam110a	Orc2	Myom1		Cdc42ep5	Dbp	Gm20604	Mn1		Gm16548	Irak1bp1	Mkks
Camsap1	Chic1		Frat1	Gm14548	Pdgfd	Nav2		Cdkn1a	Dclre1a	Gpcpd1	Nr1d1		Gm4952	Kitl	Mme
Camsap2	Clic5		Frat2	Hdhd3	Pfkfb3	Nt5e		Chka	Dis3l2	Irf2bp2	P2rx4		Golga2	Lefty1	Mta2
Cdc73	Col15a1		Glce	Iffo2	Plekhg3	Ppfibp2		Clock	Epha1	Itpr1	Parp3		Hnrnpl	Lonrf1	Nat8
Cdip1	Cyp1a1		Hunk	Lilra6	Rgs16	Ppp1r15a		Clpx	Eppk1	Lonrf3	Pxdn		Klhdc2	Map2k6	Nelfa
Cep104	D930015M05Rik		Ikbkg	Lrrc8d	Slc2a5	Rai14		Cluh	Exoc2	Lrrc28	Rnf144b		Knstrn	Ndufaf4	Neu3
Coq10a	Ddx58		Itgae	Mettl3	Syt1	Rgl3		Cnksr3	Fam172a	Moap1	Serpina7		Kynu	Ntn3	Nt5m
Cpt1a	Dhx58		Jmy	N4bp3	Taf4b	Rxrg		Crip2	Fes	Noa1	Slc7a8		Luzp1	Osbpl5	Phlpp2
Dcaf10	Dis3l		Junb	Nacc1	Tamm41	Sh3pxd2a		Cxxc5	Fgfr1	Parp16	Stx1b		Micu1	Pdxp	Ppp1r1b
Dhx8	Dusp10		Klf11	Phka2	Tbc1d15	Stat5a		Cyp4f17	Foxo3	Pex1	Tbxas1		Numa1	Per2	Rfxank
Diexf	Dusp12		Llgl2	Pira1	Trak2	Syvn1		Cyp4f39	Frmd8	Prkci	Tes		Otud7b	Phf19	Rnf8
Dnajb1	Eepd1		Lpin2	Pira11	Ulk1	Tjp3		Dag1	Gcnt2	Samd1	Tmem181a		Phospho1	Plk5	Rorc
Dnajb4	Fam110b		Lrrfip2	Pira2		Ubqln1		Desi2	Gm19619	Slc45a3	Tshz2		Ppfibp1	Rcan1	Sap30
Dnajc5	Fam83f		Mef2a	Pira7		Zdhhc18		Dhrs3	Gnat1	Tmcc1	Ttc22		Prkcd	Rhobtb1	Sestd1
Dusp13	Fbxw8		Necap1	Rnf43		Zranb1		Dscr3	Grem2	Tnnc1	Tubgcp2		Rab13	Ripk4	Slc17a8
Ehmt1	Fign		Nedd4l	Shroom1				Dtx4	Gvin1	Ubp1	Ubxn10		Rab4b	Shh	St5
Eya3	Fmo4		Nr4a1	Slc5a6				Efnb1	Gvin1	Zfyve9	Wwp2		Rad51d	Slc46a3	Tecpr2
Fam216a	Gpr25		Ormdl3	Slc6a6				Elovl3	Hcrtr2				Rassf8	Srm	Tspyl4
Fan1	Gramd1c		Pabpn1	Spatc1l				Eml3	Hoxa3				Rhoc	Stim2	Ttc23
Fkbpl	Hspa4l		Paqr9	Spry2				Fam160a1	Igf2r				S100pbp	Stx3	Uck1
Foxj3	Ick		Pisd-ps1	Syne1				Fam222a	Lpin1				Sat1	Tbc1d24	Zfp109
Galr2	Il15		Pnkd	Syne1				Fbxo44	Maff				Sco2	Tha1	Zfp688
Gm16973	Kank2		Ppargc1a	Tnfrsf19				Fip1l1	Mast3				Slc39a8	Tmc7	Zhx2
Gxylt1	Klf10		Ptpn21	Ttc39b				Fundc1	Mchr1				Slk	Traf5
L3mbtl2	Klhl5		Rbm45	Wwox				Gfer	Msto1				St3gal3	Tspan4
Ldb1	Lrch1		Sgpl1					Gfod1	Mtss1				Stk25	Wnt5b
Lor	Lypd1		Sirt1					Gfod2	Nmrk1				Stom
Luc7l	Mblac2		Slc13a2					Gldc	Nr1d2				Thap4
Med1	Med24		Snhg7					Glt28d2	Nrg4				Tmem167b
Mfap1a	Mpdz		St6galnac4					Gm16982	Per3				Ttbk2
Mul1	Nbas		St6galnac6					Gtf2ird1	Piwil2				Tymp
N4bp2	Oasl1		Txnip					Hdac5	Ppat				Ubtf
Naa16	Papss1		Xpot					Hectd2	Rere				Unc119
Nceh1	Patl2		Ypel2					Igsf11	Rev1				Xpa
Nob1	Pdlim1		Zbtb44					Il4ra	Rgs17				Yes1
Otud3	Pigh		Zfc3h1					Impa2	Rrm2				Zfyve16
Parg	Pld6		Zfp36l1					Insig2	Sergef				Znrf2
Pdzrn3	Pml		Zfp36l2					Itga5	Slc37a1
Phrf1	Pou2f1							Larp1	Snx10
Pofut2	Ppil1							Lcmt2	Stk35
Polr2a	Prdm10							Leprotl1	Tbc1d10a
Ppp1r13l	Ptrh1							Lgalsl	Tef
Prdm4	Rarb							Litaf	Thop1
Prpf3	Recql4							Lnx2	Tmem86b
Ptcd1	Rtp4							Lrfn3	Trak1
Pwp2	Samd9l							Lrp5	Usp2
Rab3ip	Sgtb							Map3k11	Wdpcp
Rad17	Shroom3							Mdfic	Wee1
Rad18	Slc12a7							Mex3c	Zc3h7b
Rc3h1	Slc25a35							Micalcl
Rdh13	Slc26a6							Mif4gd
Rlf	Slc41a2							Mreg
Rnf217	Smad2							Mthfr
Rnf25	Smarcb1							Mtnr1a
Rprd2	Sp4							Ndrg1
Rrp8	Spata17							Nek4
Rsph9	Spns2							Net1
Scaf8	Stag1							Nfil3
Slc25a22	Stard3nl							Npas2
Slc39a6	Ston2							Nr2c2ap
Smg8	Sugp2							Nuak1
Socs7	Tab1							Pagr1a
Ssfa2	Tbcel							Pbx2
Surf6	Thpo							Pdgfc
Tada2b	Thrb							Pdk4
Taf1a	Tiam2							Pgrmc2
Taf3	Tlr3							Phc2
Tbc1d8	Tnfrsf14							Phf1
Terf2ip	Traf3ip2							Pithd1
Tfip11	Trim14							Pitx3
Tmem115	Trim34a							Pnkp
Tmem131	Uba5							Pnpla6
Tmem79	Zbtb37							Pnrc1
Tnfrsf12a	Zfat							Ppp1r3c
Tox4	Zfp414							Ptpn9
Trim27	Zfp488							Pxmp4
Trnt1	Zfp608							Rab21
Ubac1	Zfp692							Rad51b
Ubr7	Zfp760							Rbm12b1
Ubtd1	Zmynd8							Rchy1
Urgcp								Reep4
Usp38								Rhod
Uspl1								Rnf125
Vipas39								Rnf144a
Wdr45								Rnf214
Wnk4								Scaf1
Xpr1								Serpinb1a
Ythdf1								Slc16a1
Ythdf2								Slc30a10
Zbtb11								Smagp
Zbtb16								St3gal1
Zbtb2								Stk40
Zbtb40								Tab2
Zfp715								Tbc1d12
Zfp869								Tbcc
								Tead3
								Thg1l
								Thra
								Tor3a
								Trappc8
								Tspan33
								Ube2d2b
								Unc119b
								Usf1
								Wdr91
								Wrnip1
								Zbtb21
								Zfp384
								Zfp385a
								Zfpm1
